# Supplementary material for: An anticancer agent-loaded PLGA nanomedicine with glutathione-response and targeted delivery for the treatment of lung cancer
Source: Royal Society of Chemistry journal article supplement (doi:10.1039/c9tb02284h), 2019-12-17
Supplement: c9tb02284h1.pdf [file c9tb02284h1.pdf]

# **Anticancer agent-loaded PLGA nanomedicine with glutathione-response and targeted delivery for the treatment of lung cancer**

Zhanxia Zhang<sup>□\*</sup>, Wei Cheng<sup>□</sup>, Yongfu Pan, Lijun Jia\*

Cancer Institute, Longhua Hospital, Shanghai University of Traditional Chinese Medicine, 725 Wanping South Road, Shanghai, 200032, China.

□ These authors contributed equally;

\*Corresponding author: Zhanxia Zhang, zhanxiazhang2014@163.com; Lijun Jia, ljia@shutcm.edu.cn

**Keywords:** anticancer nanomedicine; stimuli response; targeted delivery; lung cancer



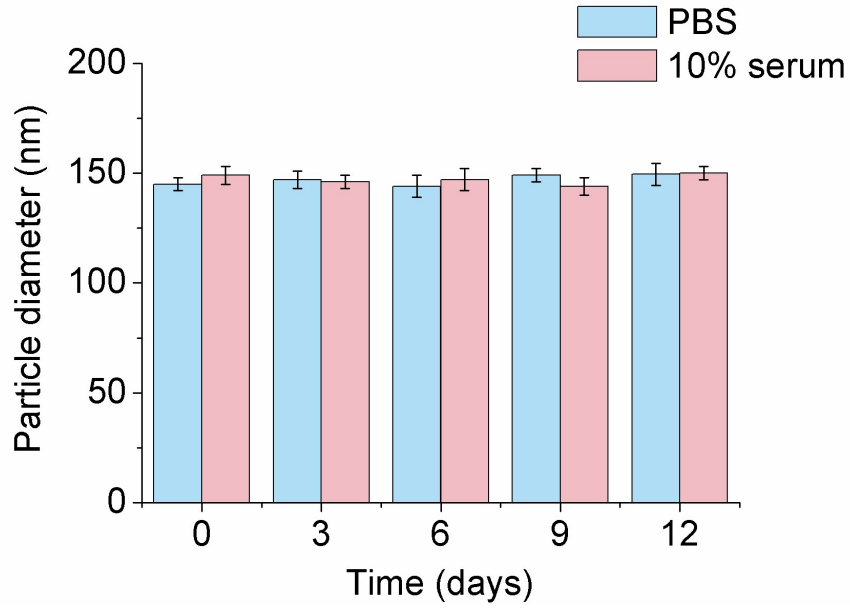

**Figure S2.** Stability of the PLGA NPs. 0.5 mg/mL PLGA NPs were dissolved in PBS buffer and 10% serum solution at 4°C for 12 days, particle size was measured by qNano particle size analyser. Error bars represent the mean  $\pm$  SD (standard deviation,  $n = 3$ ).

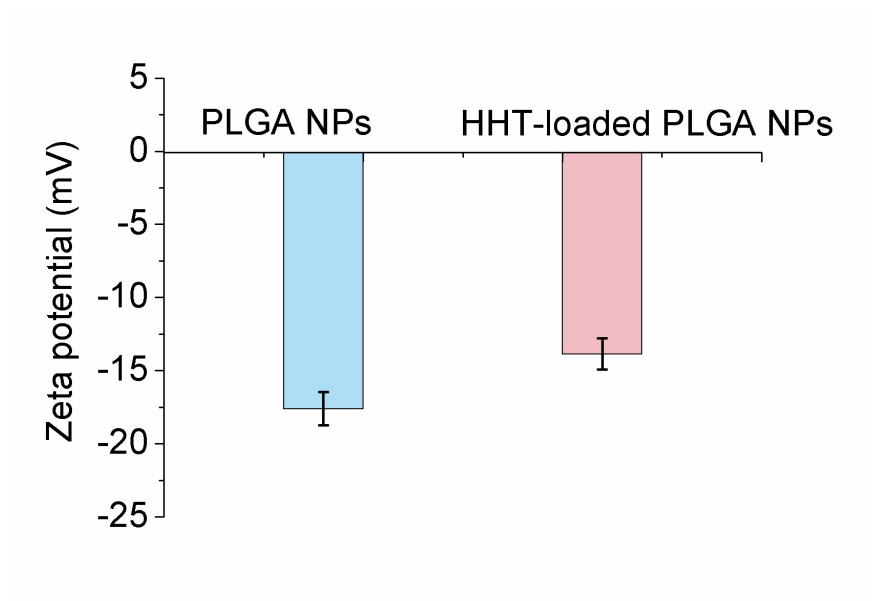

**Figure S3.** Zeta potentials of the PLGA NPs and HHT-loaded PLGA nanomedicine. Error bars represent the mean  $\pm$  SD (standard deviation, n = 3).

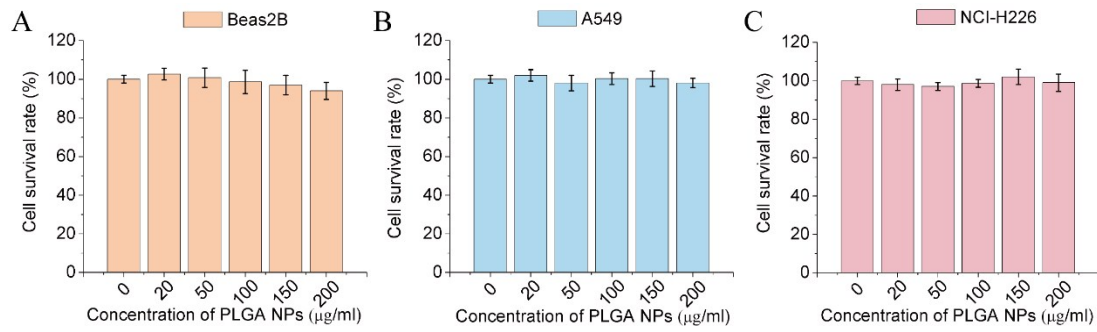

**Figure S4.** Biocompatibility of PLGA-SS-PEG NPs. Cell survival rate of (A) lung normal Beas2B, lung cancer (B) A549 and (C) NCI-H226 cells treated with different amounts of PLGA-SS-PEG NPs. Error bars represent mean  $\pm$  SD (standard deviation,  $n = 3$ ).

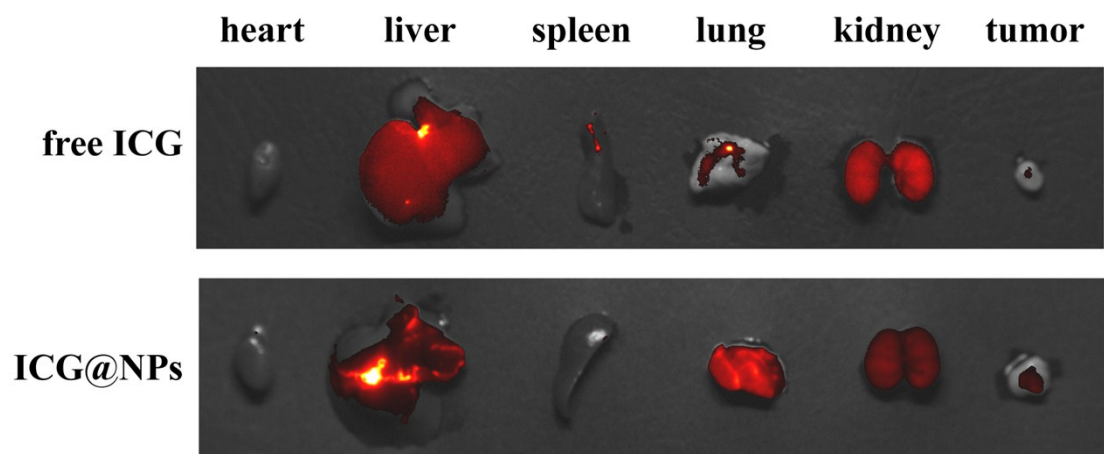

**Figure S5.** Near-infrared (NIR) fluorescence *in vivo* image of indocyanine green (ICG) was observed after 20 h of the intraperitoneal injection of free indocyanine green (ICG) and ICG nanomedicine [37].
